# Supplementary material for: Climbing strategy in herbs does not necessarily lead to lower investments into stem biomass
Source: Springer Nature journal article supplement (doi:10.1007/s11258-020-01070-9), 2020-08-09
Supplement: 11258_2020_1070_MOESM1_ESM.pdf [file 11258_2020_1070_MOESM1_ESM.pdf]

## Electronic supplementary material

### **Climbing strategy in herbs does not necessarily lead to lower investments into stem biomass**

Adam Klimeš<sup>1,3\*</sup>, Lada Klimešová<sup>2</sup>, Alena Bartušková<sup>3</sup>, Jitka Klimešová<sup>1,3</sup>

*1 - Department of Botany, Faculty of Science, Charles University, Praha, Czech Republic*

*2 - Department of Botany, Faculty of Science, University of South Bohemia in České Budějovice, Czech Republic*

*3 - Department of Functional Ecology, Institute of Botany, Czech Academy of Sciences, Třeboň, Czech Republic*

\*corresponding author; email: [adamklimes3@gmail.com](mailto:adamklimes3@gmail.com)

Table S1: Collected species of herbaceous climbers, their localities and characteristics. T = twining; S = spines or hooks; E = tendrils. Mean annual precipitation and temperature: Straznice – 627 mm, 9.3°C, Klet – 848 mm, 7.2°C, Trebon – 713 mm, 8.0°C, Edgewater - 1071 mm, 13.3°C

| Species                                            | Collection site | GPS coordinates               | Date of collection | Number of collected shoots | Climbing mechanism | Perennial/annual |
|----------------------------------------------------|-----------------|-------------------------------|--------------------|----------------------------|--------------------|------------------|
| <i>Bryonia alba</i> L.                             | Strážnice       | 48°53'57.9"N,<br>17°18'56.0"E | 18 Sep 2014        | 4                          | E                  | perennial        |
| <i>Fallopia dumetorum</i> (L.) Holub               |                 |                               | 18 Sep 2014        | 4                          | T                  | annual           |
| <i>Lathyrus pratensis</i> L.                       | Kleť            | 48°51'54.9"N,<br>14°17'01.7"E | 21 Jun 2014        | 3                          | E                  | perennial        |
| <i>Calystegia sepium</i> (L.) R. Br.               | Třeboň          | 49°00'16.1"N,<br>14°46'16.5"E | 19 Jun 2011        | 12                         | T                  | perennial        |
| <i>Echinocystis lobata</i> (Michx.) Torr. & A.Gray |                 |                               | 22 Sep 2011        | 7                          | E                  | annual           |
| <i>Galium aparine</i> L.                           |                 |                               | 28 Jun 2011        | 12                         | S                  | annual           |
| <i>Humulus lupulus</i> L.                          |                 |                               | 27 Sep 2013        | 3                          | T                  | perennial        |
| <i>Vicia cracca</i> L.                             |                 |                               | 18 Sep 2011        | 11                         | E                  | perennial        |
| <i>Vicia grandiflora</i> Scop.                     |                 |                               | 21 Jun 2014        | 3                          | T                  | annual           |
| <i>Vicia hirsuta</i> (L.) Gray                     |                 |                               | 25 Sep 2011        | 9                          | E                  | annual           |
| <i>Vicia tetrasperma</i> (L.) Schreb.              |                 |                               | 28 Jun 2011        | 10                         | E                  | annual           |
| <i>Fallopia convolvulus</i> (L.) Á. Löve           | Edgewater       | 38°53'15.0"N,<br>76°33'14.0"W | 4 Sep 2012         | 4                          | T                  | annual           |
| <i>Mikania scandens</i> (L.) Willd.                |                 |                               | 15 Oct 2012        | 4                          | T                  | perennial        |
| <i>Persicaria perfoliata</i> (L.) H. Gross         |                 |                               | 7 Sep 2012         | 4                          | S                  | annual           |
| <i>Persicaria sagittata</i> (L.) H. Gross          |                 |                               | 17 Oct 2012        | 3                          | S                  | annual           |
| <i>Strophostyles helvula</i> (L.) Elliott          |                 |                               | 17 Sep 2012        | 4                          | T                  | annual           |

Table S2: List of grassland herbs. Mean annual precipitation and temperature: Straznice – 627 mm, 9.3°C.

| Grassland herbs                                          |                                                   |
|----------------------------------------------------------|---------------------------------------------------|
| <i>Achillea collina</i> (Becker ex Rchb.f.) Heimerl      | <i>Leontodon hispidus</i> L.                      |
| <i>Asperula cynanchica</i> L.                            | <i>Leucanthemum vulgare</i> (Vaill.) Lam.         |
| <i>Asperula tinctoria</i> L.                             | <i>Linum catharticum</i> L.                       |
| <i>Astragalus danicus</i> Retz.                          | <i>Melampyrum cristatum</i> Hablitz ex Steud.     |
| <i>Campanula glomerata</i> L.                            | <i>Peucedanum cervaria</i> (L.) Cusson ex Lapeyr. |
| <i>Campanula persicifolia</i> L.                         | <i>Polygala major</i> Jacq.                       |
| <i>Centaurea jacea</i> L.                                | <i>Potentilla alba</i> L.                         |
| <i>Centaurea scabiosa</i> L.                             | <i>Potentilla erecta</i> (L.) Raeusch.            |
| <i>Centaureum erythraea</i> Rafn                         | <i>Prunella grandiflora</i> (L.) Scholler         |
| <i>Chamaecytisus virescens</i> (Kováts ex Neilr.) Dostál | <i>Pulmonaria angustifolia</i> L.                 |
| <i>Cirsium pannonicum</i> (L.f.) Link                    | <i>Ranunculus acris</i> L.                        |
| <i>Clematis recta</i> L.                                 | <i>Salvia pratensis</i> L.                        |
| <i>Dorycnium pentaphyllum</i> Scop.                      | <i>Scorzonera hispanica</i> L.                    |
| <i>Euphorbia cyparissias</i> L.                          | <i>Senecio umbrosus</i> Waldst. & Kit.            |
| <i>Euphorbia esula</i> L.                                | <i>Serratula tinctoria</i> L.                     |
| <i>Filipendula vulgaris</i> Moench                       | <i>Stachys officinalis</i> (L.) Trevis.           |
| <i>Galium boreale</i> L.                                 | <i>Symphytum tuberosum</i> L.                     |
| <i>Galium verum</i> L.                                   | <i>Tanacetum corymbosum</i> (L.) Sch.Bip.         |
| <i>Geranium sanguineum</i> L.                            | <i>Teucrium chamaedrys</i> L.                     |
| <i>Hypochoeris argentina</i> Cabrera                     | <i>Thesium linophyllum</i> L.                     |
| <i>Inula ensifolia</i> L.                                | <i>Trifolium montanum</i> L.                      |
| <i>Inula hirta</i> L.                                    | <i>Trifolium ochroleucon</i> Huds.                |
| <i>Inula salicina</i> L.                                 | <i>Trifolium pratense</i> L.                      |
| <i>Knautia kitaibelii</i> (Schult.) Borbás               | <i>Veronica austriaca</i> L.                      |
| <i>Lathyrus niger</i> (L.) Bernh.                        | <i>Vincetoxicum hirundinaria</i> Medik.           |

Table S3: List of megaherbs from Kamchatka Peninsula and the island of Sakhalin. Data on these species were used in the analysis and taken from Morozov and Belaya (1988).

### Megaherbs

*Aconitum fischeri* Rchb.  
*Aconitum maximum* Pall. ex DC.  
*Angelica genuflexa* Nutt.  
*Angelica sachalinensis* Maxim.  
*Angelica ursina* (Rupr.) Maxim.  
*Anthriscus sylvestris* (L.) Hoffm.  
*Aralia cordata* Thunb.  
*Aruncus dioicus* (Walter) Fernald  
*Parasenecio hastatus* (L.) H. Koyama  
*Parasenecio auriculatus* (DC.) J. R. Grant  
*Cardiocrinum cordatum* (Thunb.) Makino  
*Actaea simplex* (DC.) Wormsk. ex Prantl  
*Cirsium kamtschaticum* Ledeb. ex DC.  
*Cirsium weyrichii* Maxim.  
*Filipendula camschatica* f. *glabra* Koidz.  
*Filipendula camschatica* f. *typica* Koidz.  
*Heracleum lanatum* Michx.  
*Ligularia fischeri* (Ledeb.) Turcz.  
*Pleurospermum uralense* Hoffm.  
*Polygonum weyrichii* F. Schmidt  
*Jacobaea cannabifolia* (Less.) E. Wiebe  
*Urtica platyphylla* Wedd.  
*Veratrum grandiflorum* (Maxim. ex Miq.) O. Loes.  
*Veratrum oxysepalum* Turcz.

Table S4: Means and standard deviations (SD) of length and biomass measures for climbers and self-supporting herbs. In brackets are species numbers for each growth form. Length of Megaherbs was available only for 6 species.

|                                    | Annual climbers<br>(10) |         | Perennial climbers<br>(6) |         | Megaherbs<br>(24) |         | Grassland herbs<br>(50) |        |
|------------------------------------|-------------------------|---------|---------------------------|---------|-------------------|---------|-------------------------|--------|
|                                    | Mean                    | SD      | Mean                      | SD      | Mean              | SD      | Mean                    | SD     |
| Length (cm)                        | 302.052                 | 196.801 | 318.047                   | 217.609 | 246.667           | 44.572  | 39.353                  | 18.608 |
| Biomass of leaves (g)              | 5.536                   | 7.163   | 7.312                     | 7.629   | 52.504            | 110.014 | 5.045                   | 8.216  |
| Biomass of stems (g)               | 9.990                   | 9.222   | 8.488                     | 10.054  | 82.029            | 109.753 | 4.019                   | 4.950  |
| Biomass of reproductive organs (g) | 12.032                  | 20.233  | 1.335                     | 2.685   | -                 | -       | 0.801                   | 0.941  |

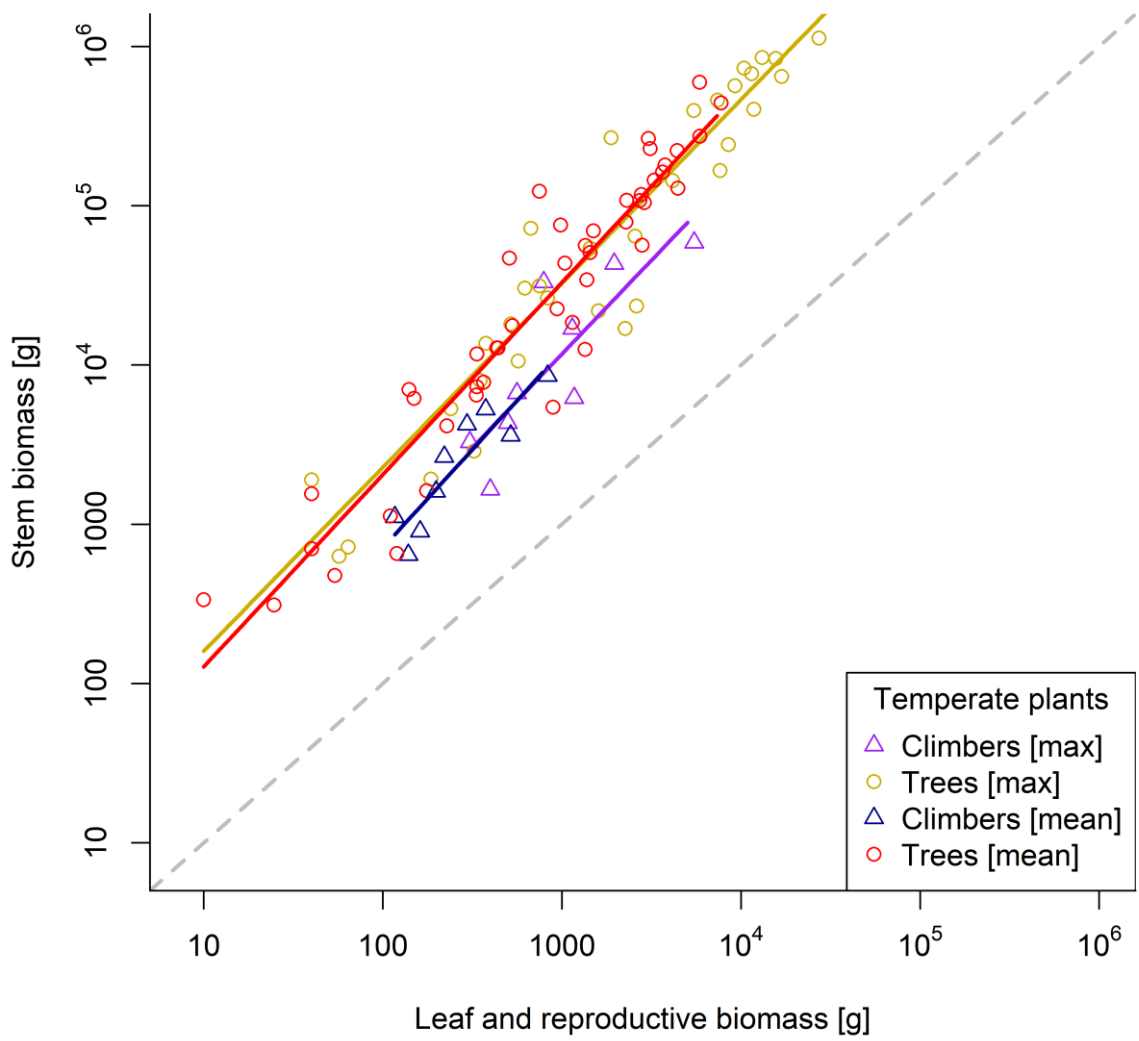

Supplementary Figure 1: Relationship of leaf and reproductive biomass (log) and stem biomass (log) for temperate woody climbers and trees. Relationships fitted using linear model are visualized for mean and max values per species showing nearly identical slopes. Data are from Ichihashi and Tateno (2015).

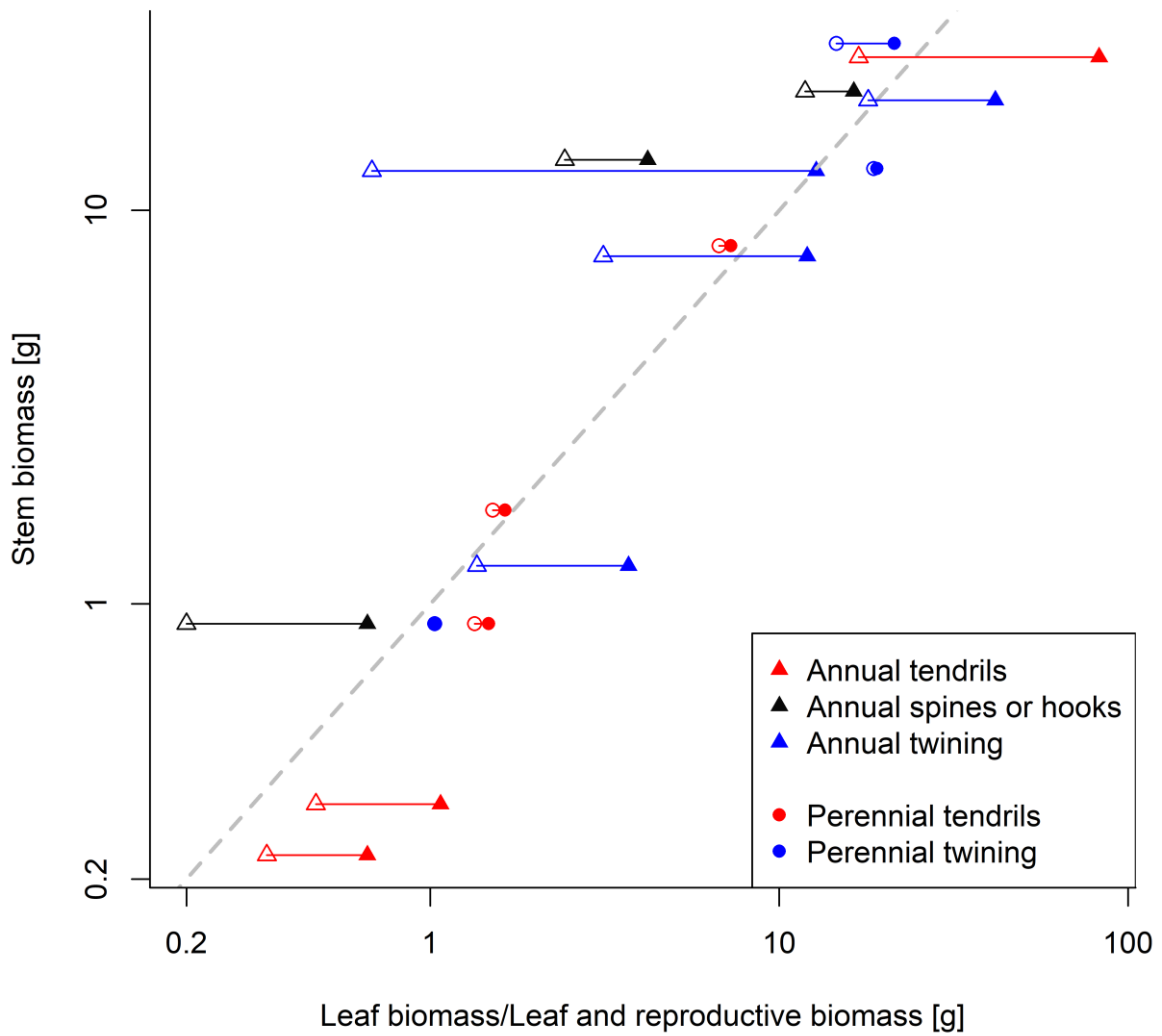

Supplementary Figure 2: Stem, leaf and reproductive biomass of herbaceous climbers. Empty symbols denote leaf biomass; filled symbols denote leaf plus reproductive biomass. The same species with and without reproductive biomass is connected by black line. Grey dotted line marks slope 1.

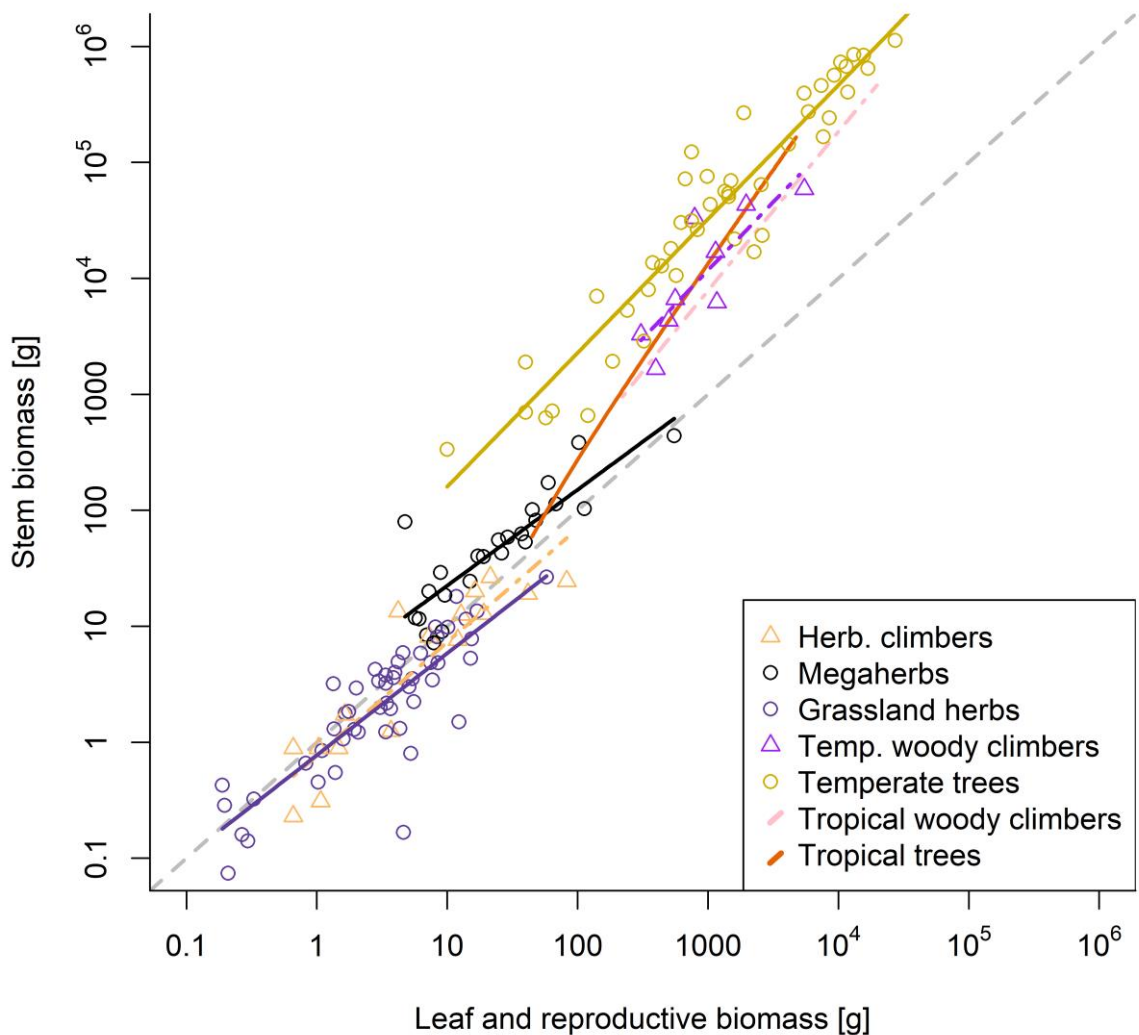

Supplementary figure 3: Relationship between stem biomass (log) and remaining aboveground biomass (log) of climbers and self-supporting plants. Lines for herbaceous climbers, megaherbs and grassland herbs are modelled using a phylogenetic generalized least squares model. For megaherbs, data on reproductive biomass is not available, thus only stem biomass is included (identical to Fig. 1). In case of temperate woody plants, we visualized fitted lines from linear regression. For tropical woody plants datapoints are not available. Lines for climbers are dash-and dotted. The grey dotted line marks slope 1.



## Supplementary information 1

To compare allocation of herbaceous climbers and self-supporting herbs with their woody counterparts we used published equations about tropical woody climbers and trees. These are:

$$1) \text{ } AGB_{climbers} = 10^{0.07 + 2.17 * \log(D)}$$

$$2) \text{ } AGB_{trees} = 0.603 * e^{-1.754 + 2.665 * \ln(D)}$$

$$3) \text{ } LM_{climbers} = 10^{-0.57 + 0.81 * \log(BA)}$$

$$4) \text{ } LM_{trees} = 10^{-1.26 + 0.84 * \log(BA)}$$

where  $AGB$  stands for aboveground biomass,  $D$  for stem diameter,  $LM$  for leaf biomass and  $BA$  for basal area ( $BA = \pi * (D/2)^2$ ),  $\log$  being the decimal logarithm and  $\ln$  being the natural logarithm with base  $e$ . Equations 1, 3 and 4 are from Gerwing and Fabias (2000); equation 2 is from Higuchi et al. (1998).

From these equations we estimated relationship between leaf and stem biomass (rest of aboveground biomass – reproductive organs included) separately for trees and woody climbers. This was done by simulation of stem diameter values in reported range of 1 to 16 cm. We simulated 1501 of such values and computed leaf and stem biomass from each of them using abovementioned equations. Intercept and slope were estimated using linear model with this computed stem biomass (as response) and leaf biomass (as predictor). Computed leaf and stem biomass values represented a line (explained variability of the linear model:  $R^2_{climbers} = 1$ ,  $R^2_{trees} = 0.9996$ ).

Resulting relationships (Fig. 2):

$$5) \text{ } \ln(SM_{climbers}) = -0.497 + 1.370 * \ln(LM_{climbers})$$

$$6) \text{ } \ln(SM_{trees}) = -1.991 + 1.659 * \ln(LM_{climbers})$$

where  $SM$  stands for stem biomass,  $LM$  for leaf biomass (plus reproductive organs) and  $\ln$  for natural logarithm with base  $e$ .
